# Supplementary material
Source: PubMed Central journal article supplement (PMC3024691)
Supplement: 1013965108_pnas.201013965SI.pdf [file 1013965108_pnas.201013965SI.pdf]

# Supporting Information

Nguyen et al. 10.1073/pnas.1013965108

## SI Methods

**Sample Preparation for Scanning Block-Face Serial EM.** A 9-mo-old female C57BL/6J mouse was anesthetized with pentobarbital and transcardially perfused with Ringer solution followed by 2.5% glutaraldehyde/2% paraformaldehyde in cacodylate buffer (Ted Pella) containing 2 mM  $\text{CaCl}_2$  (CAC+Ca buffer). An eye was removed and the ONH carefully dissected and postfixed in the same fixative agent for 2 h at 4 °C. The nerve was washed in CAC+Ca buffer for 30 min at 4 °C. The nerve was placed in CAC+Ca buffer containing 2%  $\text{OsO}_4$  and 1.5% potassium ferrocyanide for 3 h at room temperature (RT). The nerve was washed with  $\text{ddH}_2\text{O}$  three times for 5 min and then placed in 1% aqueous thiocarbohydrazide (Sigma) for 20 min at RT. The nerve was washed three times for 5 min in  $\text{ddH}_2\text{O}$  and then

placed in 2% aqueous  $\text{OsO}_4$  for 1 h at RT. The nerve was washed three times for 5 min and placed in 1% aqueous uranyl acetate at 4 °C overnight. The nerve was washed three times for 5 min in  $\text{ddH}_2\text{O}$  and incubated in lead aspartate solution in 60 °C oven for 30 min, as described previously (1). The nerve was washed three times for 5 min in  $\text{ddH}_2\text{O}$  and then dehydrated in a series of ice-cold ethanol solutions (20%, 50%, 70%, 90%, 100%, 100%) followed by ice-cold dry acetone for 10 min. The nerve was placed in acetone at RT for 10 min and then infiltrated with an ascending series of Durcupan:acetone solutions. The nerve was infiltrated with 100% Durcupan and then cured at 60 °C for 2 d. The nerve was trimmed to remove excess plastic and attached to an aluminum pin, grounded with silver paint, and sputter coated with gold-palladium before imaging.

- Walton J (1979) Lead aspartate, an en bloc contrast stain particularly useful for ultrastructural enzymology. *J Histochem Cytochem* 27:1337–1342.

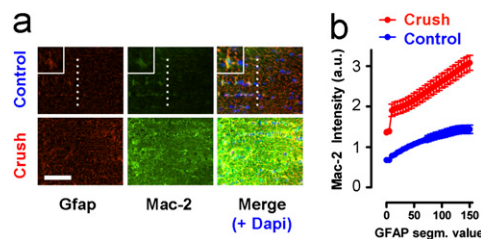

**Fig. S1.** Optic nerve astrocytes up-regulate Mac-2 after optic nerve crush. (A) Optic nerve crush of the myelinated nerve near the MTZ promotes up-regulation of GFAP and Mac-2. Note the GFAP expression within Mac-2-expressing cells at the MTZ in the absence of crush (left of dotted line). Inset shows 2 $\times$  magnified view of a Mac-2-positive GFAP-positive cell amid doubly negative cells. (B) Mac-2 is increased by crush in optic nerve astrocytes. Mac-2 intensity represents the mean intensity value within pixels identified based on GFAP expression, at increasingly stringent GFAP segmentation values. Mac-2 expression is higher after crush; for example,  $P < 0.0001$ , two-tailed unpaired  $t$  test, at a segmentation of 100. Values are mean values from six nerves each (an average of six sections per nerve), and error bars represent SEM. (Scale bar: 100  $\mu\text{m}$ .)

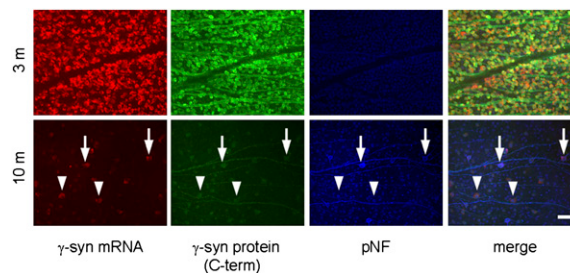

**Fig. S2.** Loss of RGCs and increase in pNF<sup>+</sup> RGCs in glaucomatous DBA/2J. Midperipheral regions of a 3-mo and a highly degenerated 10-mo DBA/2J retina show that the loss of RGCs and appearance of damaged RGCs in glaucomatous DBA/2J mice can be detected by the RGC-specific gene  $\gamma$ -synuclein and a pNF antibody, respectively. Note the overlap of  $\gamma$ -synuclein mRNA and protein labeling in both healthy and degenerated retinas, the comparable numbers of cells without  $\gamma$ -synuclein expression (showing that amacrine cells do not die in this glaucoma animal model), the loss of nuclei (cross-reacting nuclear epitope of this pNF antibody), and the fact that some (arrows) but not all (arrowheads) remaining RGCs have somatodendritic phosphorylated neurofilament labeling. (Scale bar: 50  $\mu\text{m}$ .)

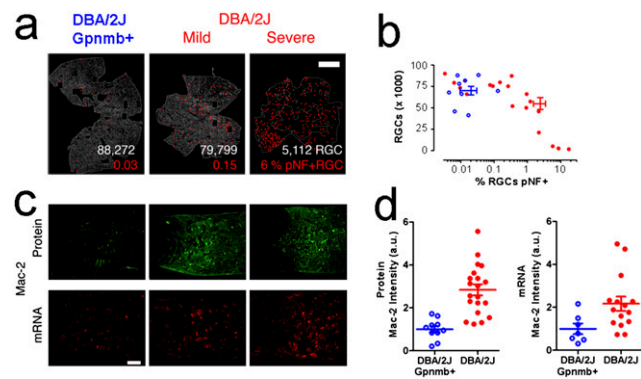

**Fig. 53.** DBA/2J have increased Mac-2 expression at the MTZ relative to age-matched DBA/2J Gpnmb<sup>+</sup> mice. (A) Loss of RGCs, detected by  $\gamma$ -synuclein mRNA (gray), and increase in pNF<sup>+</sup> RGCs (red dots) in 9- to 10-m DBA/2J mice relative to age-matched DBA/2J Gpnmb<sup>+</sup> mice. (B) DBA/2J mice have reduced number of RGCs, based on counts of cells expressing Sncg mRNA, and increased numbers of pNF<sup>+</sup> RGCs. (C) DBA/2J mice also have higher levels of Mac-2 protein and mRNA at the MTZ. (D) Quantification of fluorescence intensity (using a single segmentation value) shows significant increases in Mac-2 mRNA and protein ( $*P < 0.0001$ ,  $**P = 0.02$ , Mann–Whitney two-tailed *t* test). Values are the mean of 10 DBA/2J Gpnmb<sup>+</sup> and 15 to 19 DBA/2J nerves. Error bars represent SEM. (Scale bars: A, 500  $\mu$ m; C, 50  $\mu$ m.)

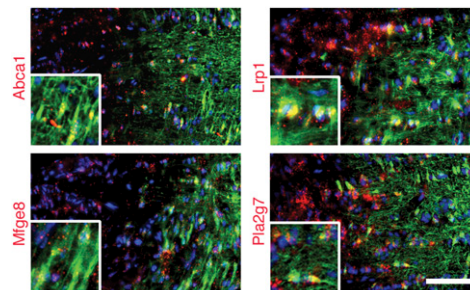

**Fig. 54.** MTZ astrocytes express phagocytosis-related genes. Some of the phagocytosis-related genes expressed by MTZ astrocytes include Abca1, Lrp1, Mfge8, and Pla2g7. Mac-2 labeling is shown in green and mRNAs for the respective genes are shown in red. Nuclei labeled by Dapi are shown in blue. Boxes are 2 $\times$  magnified view of select MTZ astrocyte somata. (Scale bar: 50  $\mu$ m.)

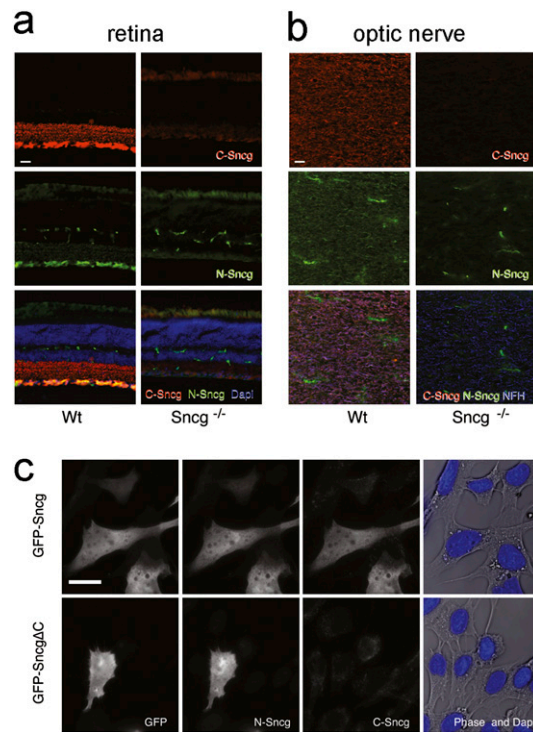

**Fig. S5.** Two  $\gamma$ -synuclein antibodies show specific labeling and recognize different parts of  $\gamma$ -synuclein. (A)  $\gamma$ -Synuclein antibodies label approximately half of somata in the ganglion cell layer, as well as axon bundles and IPL only in mice with  $\gamma$ -synuclein. (B)  $\gamma$ -Synuclein antibodies label optic nerve axons only in mice with  $\gamma$ -synuclein. Some axons are visualized by their expression of heavy neurofilament (NFH). Residual labeling for the mouse N-Sncg antibody in  $Sncg^{-/-}$  mice is caused by labeling of blood vessels by the secondary antibody. (C) Cells transfected with GFP fusion constructs containing the full-length mouse  $\gamma$ -synuclein (GFP-Sncg) or mouse  $\gamma$ -synuclein lacking 15 C-terminal aa (GFP-Sncg $\Delta$ C), and labeled with antibodies to GFP, to the C-terminal 16 aa of mouse  $\gamma$ -synuclein (C-Sncg), or a commercial mouse monoclonal antibody generated against human  $\gamma$ -synuclein (N-Sncg). Note that the N-Sncg antibody equally labels cells transfected by  $\gamma$ -synuclein with or without the C terminus; that is, this antibody recognizes an epitope outside the C terminus. (Scale bars: 20  $\mu$ m.)

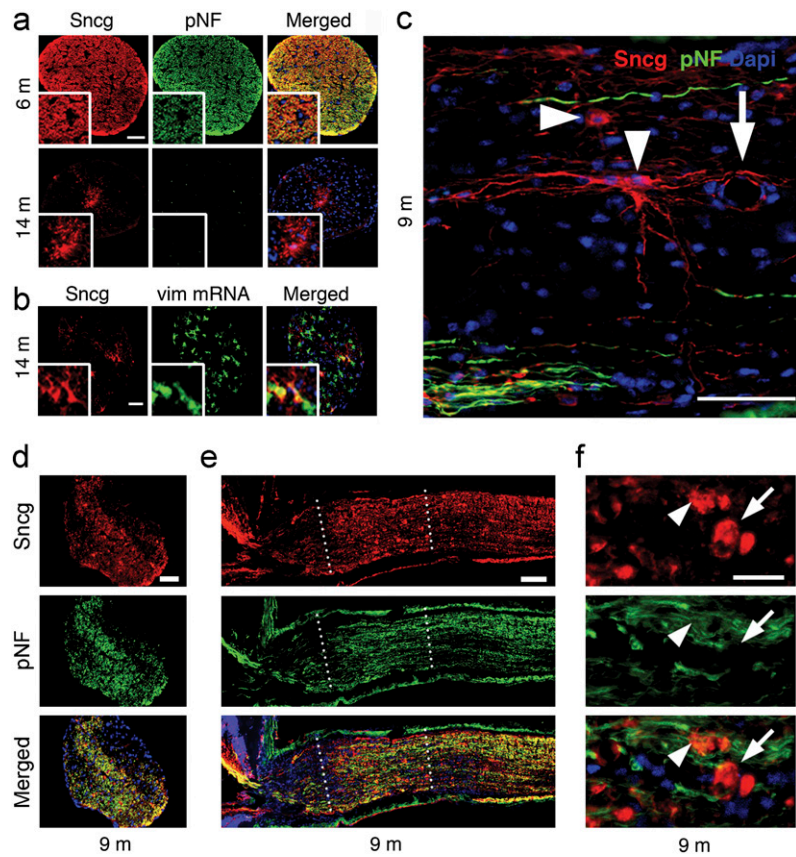

**Fig. 56.**  $\gamma$ -Synuclein is found within astrocytes and axonal spheroids in glaucomatous DBA/2J mice. (A) Nerve cross sections showing that  $\gamma$ -synuclein is found in axons in a healthy nerve from a 6-mo DBA/2J mouse but also within cells in a highly degenerate nerve from a 14-mo DBA/2J mouse. (B) Nerve cross sections showing that  $\gamma$ -synuclein-positive cells express Vim mRNA, an astrocyte marker. (C) Longitudinal section shows two cells labeled by  $\gamma$ -synuclein (arrowheads), which are astrocytes based on their morphology and wrapping of a blood vessel (arrow). (D) Cross-section in the orbital portion of the optic nerve shows sectorial axon loss. (E) Longitudinal section through the same optic nerve has numerous  $\gamma$ -synuclein-containing axonal spheroids concentrated at the MTZ (flanked by dotted lines). (F) Longitudinal section of the MTZ in another 9-mo DBA/2J optic nerve shows that some axonal spheroids are contiguous with axons labeled by pNF (arrowhead) but others are not (arrow). Nuclei labeled by Dapi are shown in blue. *Insets:* A, magnification of 2 $\times$ ; B, magnification of 3 $\times$ . (Scale bars: A–D, 50  $\mu$ m; E, 100  $\mu$ m; F, 20  $\mu$ m.)

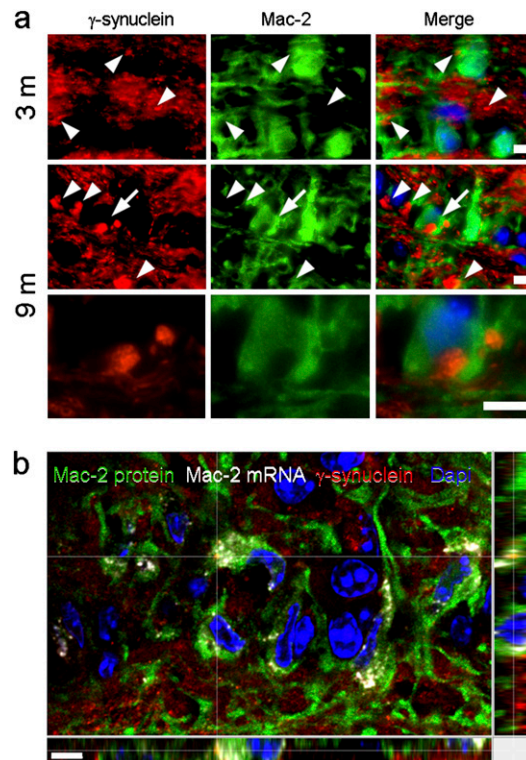

**Fig. 57.** Axon protrusions and evulsions at the MTZ in preglaucomatous optic nerves contain  $\gamma$ -synuclein. (A) Confocal slices show increased size and number of spheroidal structures containing  $\gamma$ -synuclein (arrow and arrowheads) at the MTZ in 9-mo relative to 3-mo DBA/2J mice. Many but not all spheroids are near Mac-2-expressing astrocytes. Arrow points to the spheroids shown in a high-power view (Lower). (B) Confocal of MTZ 24 h after translimbal laser increase in IOP, showing a  $\gamma$ -synuclein body fully surrounded by Mac-2 mRNA and protein. (Scale bars: 5  $\mu$ m.)

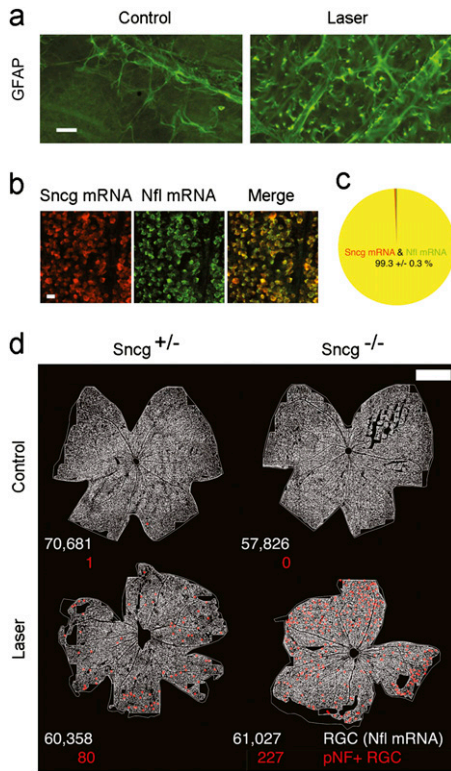

**Fig. S8.** Translimbal laser photocoagulation produced large increases in pNF<sup>+</sup> RGCs but no large or sectorial loss of RGCs, as detected by Nfl mRNA. (A) GFAP is expressed in astrocytes in a nonlasered eye, and in both astrocytes and Müller cell endfeet in a lasered eye. (B) Nfl and  $\gamma$ -synuclein mRNAs label the same cells in retina flat-mounts of C57BL/6J mice. (C) Counts in C56BL/6J retinas show that  $99.3 \pm 0.3\%$  of cells label with both mRNAs,  $0.5 \pm 0.3\%$  of cells label only with Nfl mRNA, and  $0.2 \pm 0.2\%$  of cells label only with  $\gamma$ -synuclein mRNA (8,439 cells counted, in five fields in each of five retinas). (D) Representative retina whole mounts showing RGCs identified by Nfl mRNA (gray), and pNF<sup>+</sup> RGCs (red dots) in lasered and nonlasered retinas from Sncg<sup>+/-</sup> and Sncg<sup>-/-</sup> mice. Number of RGCs and pNF<sup>+</sup> RGCs are shown under each retina in white and red, respectively. (Scale bars: A, 10  $\mu\text{m}$ ; C, 500  $\mu\text{m}$ .)

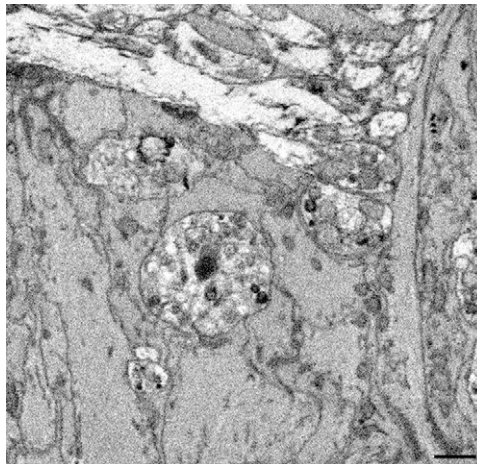

**Movie S1.** Axonal evulsion at the glial lamina, fully enveloped by astrocytic processes. Frames are 70 nm apart. (Scale bar: 1  $\mu\text{m}$ .)

[Movies S1](#)

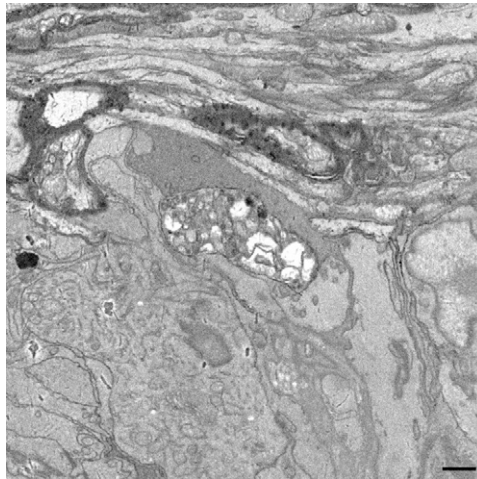

**Movie S2.** Axonal evulsion at the MTZ, enwrapped by astrocytic processes. Frames are 70 nm apart. (Scale bar: 1  $\mu\text{m}$ .)

[Movies S2](#)

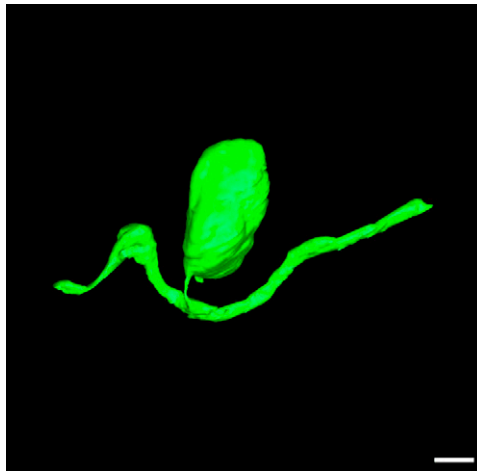

**Movie S3.** Reconstruction of axonal evulsion at the glial lamina, connected to the axon of origin by a thin stalk. (Scale bar: 5  $\mu\text{m}$ .)

[Movies S3](#)

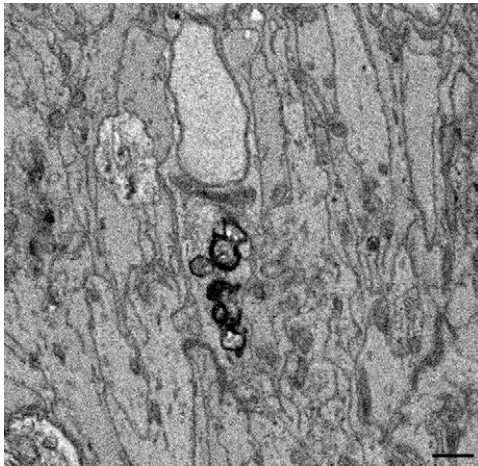

**Movie S4.** Astrocyte degradation of an axonal evulsion at the glial lamina. Frames are 70 nm apart. (Scale bar: 1  $\mu\text{m}$ .)

[Movies S4](#)

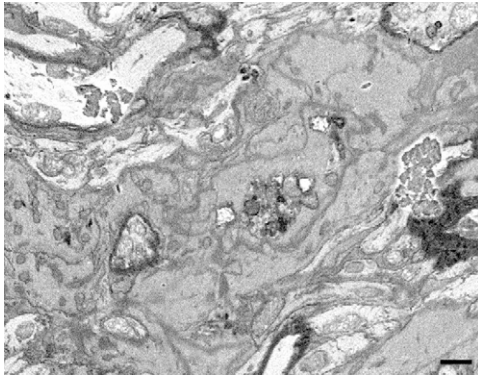

**Movie S5.** Astrocyte degradation of an axonal evulsion at the MTZ. Frames are 70 nm apart. (Scale bar: 1  $\mu\text{m}$ .)

[Movies S5](#)
